# Supplementary material for: CO2 Hydrogenation to Methanol over Mesoporous SiO2-Coated Cu-Based Catalysts
Source: PubMed Central journal article supplement (PMC11342343; doi:10.1021/acsnanoscienceau.4c00016), 2024-07-18
Supplement: ng4c00016_si_001.pdf [file ng4c00016_si_001.pdf]

## Supplementary Material

# CO<sub>2</sub> hydrogenation to methanol over mesoporous SiO<sub>2</sub>-coated Cu-based catalysts

Luiz H. Vieira<sup>1\*</sup>, Marco A. Rossi<sup>1</sup>, Letícia F. Rasteiro<sup>2</sup>, José M. Assaf<sup>3</sup>, Elisabete M. Assaf<sup>1\*</sup>

<sup>1</sup>*São Carlos Institute of Chemistry, University of São Paulo, São Carlos, São Paulo, 13560-970, Brazil*

<sup>2</sup>*School of Chemical & Biomolecular Engineering, Georgia Institute of Technology, Atlanta, Georgia 30332, United States*

<sup>3</sup>*Department of Chemical Engineering, Federal University of São Carlos, São Carlos, São Paulo, 13565-905, Brazil*

\*Corresponding authors: [eassaf@iqsc.usp.br](mailto:eassaf@iqsc.usp.br); [lhvieira@iqsc.usp.br](mailto:lhvieira@iqsc.usp.br)

**KEYWORDS:** CO<sub>2</sub> utilization; methanol synthesis; copper; indium; silica; core-shell; mesoporous material.

## 1. Experimental Section

### 1.1. Synthesis of In-promoted catalysts

The catalysts were synthesized using the surfactant-assisted co-precipitation method. Initially, 60 mmol of CTAB were added to 250 mL of H<sub>2</sub>O. The solution was kept under constant stirring until complete homogenization. Then, 15 mmol of Cu(NO<sub>3</sub>)<sub>2</sub>, 13.5 mmol of ZrO(NO<sub>3</sub>)<sub>2</sub> or Ce(NO<sub>3</sub>)<sub>3</sub>, and 1.5 mmol of In(NO<sub>3</sub>)<sub>3</sub> were added and the stirring was maintained for another 2 hours. The precipitation occurred by the addition of a 0.5 M solution of NaOH, keeping the pH at a constant value of 10 throughout the procedure. After completing the precipitation, the solution was kept under stirring for 12 hours at room temperature. The precipitate was separated by vacuum filtration and washed in H<sub>2</sub>O until a pH ~7 was obtained in the washing solution. The solid was dried in an oven at 333 K for 48 hours and calcined at 873 K for 2 hours under an oxidizing atmosphere. The catalyst prepared using the ZrO(NO<sub>3</sub>)<sub>2</sub> precursor was named CuZrIn and those prepared using Ce(NO<sub>3</sub>)<sub>3</sub> were named CuCeIn.

### 1.2. Synthesis of SiO<sub>2</sub>-coated catalysts

For the synthesis of the SiO<sub>2</sub>-coated catalysts, 0.89 g of the polymer polyvinylpyrrolidone (PVP10, average molar mass equal to 10000 g.mol<sup>-1</sup>) were dissolved in 100 mL of an H<sub>2</sub>O and CH<sub>3</sub>CH<sub>2</sub>OH solution 50% (v/v) along with 0.36 g of Cu(NO<sub>3</sub>)<sub>2</sub>, 0.05 g of In<sub>2</sub>(NO<sub>3</sub>)<sub>3</sub>, and 0.31 g of ZrO(NO<sub>3</sub>)<sub>2</sub> (or 0.59 g of Ce(NO<sub>3</sub>)<sub>3</sub>). The mixture was stirred for 4 h at room temperature to ensure the complete solubilization of the salts and the chains of the PVP polymer. After that, the resulting solution was transferred to a stainless-steel autoclave (filling ~80% of its volumetric capacity) and kept in an oven for 12 hours at 453 K. The mixture containing the oxide particles was transferred to a 1L beaker. After this, 312.8 mL of ethanol, 93.9 mL of water, 14.5 mL of 27% (v/v) NH<sub>4</sub>OH solution, and 0.168g of the surfactant CTAB were introduced into the same beaker. This suspension was stirred for 2 hours at room temperature followed by the addition of 2.175 mL of TEOS at a rate of ~1 drop per minute. The resulting suspension was left under vigorous stirring for 24 hours at room temperature. After this step, the suspension was centrifuged, and the obtained gel was dried 353 K for 24 hours. Finally, the resulting

solid was ground and calcined at 923 K for 6 hours. The materials were named CuZrIn@mSiO<sub>2</sub> and CuCeIn@mSiO<sub>2</sub>. The molar proportions between the cations were the same as the best catalysts obtained in previous stages. 50% Cu, 5% In, and 45% Zr/Ce. PVP was employed as a control agent for the size and homogeneity of the particles that would be formed and as a directing agent, along with CTAB, for the formation of the silica coating around the oxide particles formed during the solvothermal treatment.

### **1.3. Catalyst characterization**

#### **1.3.1. X-ray diffraction**

X-ray diffraction (XRD) measurements were conducted using a Bruker Da Vinci D8 Advance diffractometer equipped with CuK $\alpha$  radiation (wavelength of 0.15418 nm) and a curved graphite monochromator. Data were collected over the 2 $\theta$  range from 10° to 80° with a scan step of 0.02° and a counting time of 1 s. The crystalline phases were identified using Crystallographica Search Match software.

#### **1.3.2. X-ray fluorescence**

The chemical composition of the synthesized materials was analyzed using a PANalytical X-ray fluorescence spectrometer, model MiniPa14.

#### **1.3.3. Transmission electron microscopy**

The transmission electron microscopy analyses were performed using a JEOL transmission electron microscope (model 2100). The instrument was operated with a hexaboron lanthanum (LaB<sub>6</sub>) source and an acceleration voltage of 200 kV. The samples were previously dispersed in isopropanol using an ultrasound bath and deposited on Ni grids for analysis.

#### **1.3.4. Temperature-programmed reduction in H<sub>2</sub>**

The temperature-programmed reduction (TPR) analysis was conducted using a Micromeritics Pulse ChemSorb 2750 instrument equipped with a thermal conductivity detector (TCD). A 50 mg sample of the catalyst was loaded into the reactor and subjected to reduction while heating in a 10% H<sub>2</sub>/Ar gas mixture at a

flow rate of 30 mL/min. The temperature ramp ranged from room temperature to 1173 K at a rate of 10 K/min.

### **1.3.5. N<sub>2</sub> physisorption**

The specific surface area and pore diameter distribution of the samples were characterized using N<sub>2</sub> adsorption/desorption measurements conducted at liquid nitrogen temperature (77 K). The relative pressure intervals ranged from 0.001 to 0.998. The experimental setup employed a Quantachrome Nova 100 system. Prior to analysis, the samples underwent vacuum pretreatment at approximately  $10 \times 10^{-6}$  Pa for 2 hours at 493 K. The BET method was utilized to determine the specific surface area ( $S_{\text{BET}}$ ), while the BJH method was employed to assess mesopore volume and pore diameter distribution.

### **1.3.6. N<sub>2</sub>O chemisorption**

N<sub>2</sub>O chemisorption experiments were conducted using an analytical Multipurpose system equipped with a thermal conductivity detector (TCD). Approximately 200 mg of the catalysts were loaded into a U-tube reactor. The catalyst surfaces underwent cleaning at 523 K for 1 hour under an inert atmosphere, with a flow rate of 30 mL/min. After cooling to room temperature, the samples were heated to 503 K in a 10% H<sub>2</sub>/Ar mixture with a flow rate of 30 mL/min, ramping up at 5 K/min to completely reduce the copper. Subsequently, the samples were cooled to 298 K and exposed to a 10% N<sub>2</sub>O/He mixture for 30 minutes to oxidize the surface copper layer. Finally, a second reduction was performed at 503 K in a 10% H<sub>2</sub>/Ar mixture with a flow rate of 30 mL/min at 5 K/min to reduce the surface copper atoms. Between each gas mixture exchange, the system was purged using N<sub>2</sub> at a flow rate of 30 mL/min for 30 minutes to remove the physically adsorbed molecules remaining on the surface of the catalysts. Dispersion was calculated by the ratio between the amount of copper in the surface and total amount in the catalyst. Metallic surface area was calculated by relating the number of copper atoms in the surface and the atom density in a monolayer ( $N_a = 1.469 \times 10^{19}$  atoms.m<sup>-2</sup>).

### **1.3.7. Temperature-programmed desorption of CO<sub>2</sub>**

The CO<sub>2</sub> temperature-programmed desorption (TPD) experiments were performed using a Micromeritics Pulse ChemSorb 2750 instrument equipped with a thermal conductivity detector (TCD). 200 mg of the catalysts were loaded into a U-tube reactor for analysis. The catalyst surfaces underwent cleaning at 523 K for 1 hour under an inert atmosphere, with a flow rate of 30 mL/min. After cooling to room temperature, the samples were heated to 503 K in a 10% H<sub>2</sub>/Ar mixture with a flow rate of 30 mL/min, ramping up at 5 K/min. Subsequently, the system was purged with N<sub>2</sub> at a flow rate of 30 mL/min for 30 minutes and cooled to 298 K. The catalysts were then exposed to CO<sub>2</sub> at a flow rate of 30 mL/min. To remove physically adsorbed CO<sub>2</sub> molecules, the system was purged with N<sub>2</sub> once more. Finally, the catalysts were heated from room temperature to 473 K at a rate of 10 K/min and maintained at this temperature until the signal in the TCD detector returned to the baseline.

#### 1.4. Catalytic tests

The CO<sub>2</sub> hydrogenation reactions were carried out in a fixed-bed stainless-steel tubular reactor with dimensions of 304.3 mm in length and an internal diameter of 9.1 mm. Prior to each test, the catalyst underwent in situ pre-reduction at 503 K for 1 hour using a pure H<sub>2</sub> flow (at a rate of 30 mL/min) under atmospheric pressure. The reduction temperature was chosen based on the maximum high-temperature peak observed in TPR analysis to ensure that all available surface Cu sites were effectively reduced and to prevent unnecessary use of higher temperatures. Subsequently, the reactor was cooled down to the designated reaction temperature, and the gas flow was switched to an H<sub>2</sub>/CO<sub>2</sub> mixture with a molar ratio of 3:1. The system was then pressurized to specified levels. Gaseous products were analyzed using a 7890A gas chromatograph (Agilent Technologies) equipped with thermal conductivity (TCD) and flame ionization (FID) detectors. The CO<sub>2</sub> conversion and product selectivity were calculated using the following equations:

$$\text{Selectivity to } i \text{ (\%)} = \left( \frac{f_i A_{i,out}}{\sum f_i A_{i,out}} \right) \times 100 \quad (\text{S1})$$

$$\text{CO}_2 \text{ conversion (\%)} = \left( \frac{CO_{2,in} - CO_{2,out}}{CO_{2,in}} \right) \times 100 \quad (\text{S2})$$

where,  $A_{i,out}$  and  $f_i$  represent the chromatogram peak area and the molar calibration factor, respectively, for each component  $i$  identified at the output.  $CO_{2,in}$  and  $CO_{2,out}$  represent the total number of mols of  $CO_2$  that entered the reaction and the total number of mols of  $CO_2$  that exited, respectively.

The space-time yield of methanol ( $g_{MeOH}.kg_{cat}^{-1}.h^{-1}$ ) was calculated based on conversion and selectivity to methanol, using the following equation:

$$STY \text{ (Space Time Yield)} = \frac{X_{CO_2} \times S_{CH_3OH} \times F_{CO_2,in} \times MW_{CH_3OH}}{W_{cat} \times V_m} \quad (S3)$$

where  $X_{CO_2}$  represents the conversion of  $CO_2$ ,  $S_{CH_3OH}$  is the selectivity to  $CH_3OH$ ,  $F_{CO_2,in}$  is the volumetric flow rate of  $CO_2$  ( $mL.h^{-1}$ ),  $MW_{CH_3OH}$  is the molecular weight of methanol ( $32 g.mol^{-1}$ ),  $W_{cat}$  is the catalyst weight used (kg), and  $V_m$  is the ideal gas molar volume at standard pressure and temperature ( $mL.mol^{-1}$ ).

The turnover frequency (TOF) of methanol was calculated by the following equation:

$$TOF_{CH_3OH}(s^{-1}) = \frac{\text{Number of molecules of methanol produced}}{\text{Time (s)} \times \text{Number of metallic Cu atoms}} \quad (S4)$$

$$TOF_{CH_3OH}(s^{-1}) = \frac{A \times Na}{3600 \times S_{Cu} \times Na} \quad (S5)$$

where  $A$  represents methanol activity in  $mol.g^{-1}.h^{-1}$ ,  $Na$  is Avogadro's number ( $6.023 \times 10^{23}$ ),  $S_{Cu}$  denotes Cu metallic area in  $m^2.g^{-1}$  and  $Na$  designates the number of Cu atoms in a monolayer ( $Na = 1.469 \times 10^{19}$  atoms. $m^{-2}$ ). The TOF of CO was similarly calculated, based on number of CO molecules produced.

### 1.5. Chemometric analysis

The impact of pressure, temperature, and space velocity parameters on the  $CO_2$  hydrogenation process was investigated using chemometric tools. The experiments followed the Central Composite Design (CCD) methodology, which included upper, lower, center, and axial points. These points were defined for each of the variables (pressure, temperature, and space velocity) and are summarized in Table S3. We examined the main effects of each variable on methanol selectivity, as well as their interactions. The results were visually represented through Pareto

charts (Figures S2-S4). To predict methanol selectivity values for specific combinations of pressure, temperature, and space velocity that were not experimentally tested within the analysis range defined by the central composite design, we constructed response surfaces using a quadratic model. This model involved fitting the experimental data to a second-degree polynomial equation. The statistical data processing was carried out using Chemoface software version 1.6.1.

## Supplementary Figures

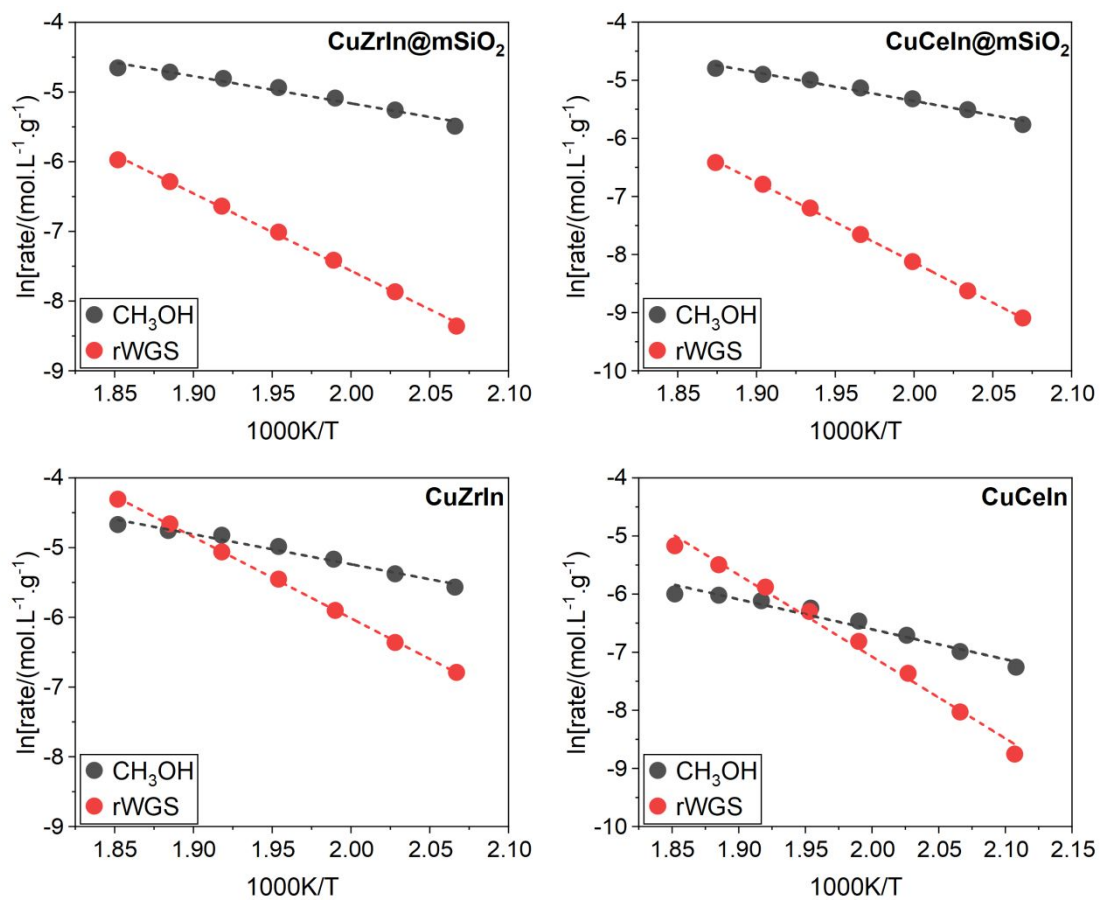

**Figure S1.** Arrhenius plots for  $\text{CuCeIn@mSiO}_2$ ,  $\text{CuCeIn}$ ,  $\text{CuZrIn@mSiO}_2$  and  $\text{CuZrIn}$  catalysts.



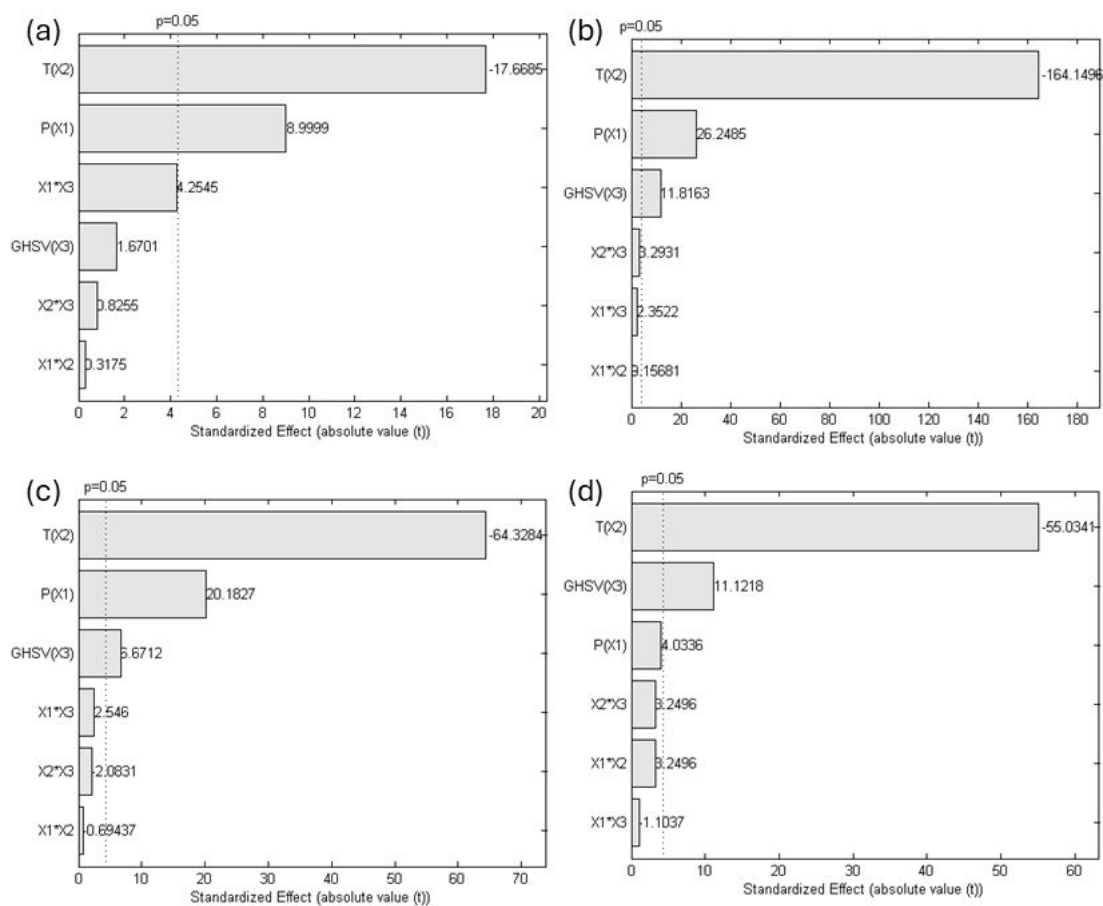

**Figure S2.** Pareto charts of the standardized effects caused by the variation of pressure, temperature, and space velocity on the CH<sub>3</sub>OH selectivity for (a) CuCeIn@mSiO<sub>2</sub>, (b) CuCeIn, (c) CuZrIn@mSiO<sub>2</sub> and (d) CuZrIn catalysts. The analysis was carried out with 95% confidence level.

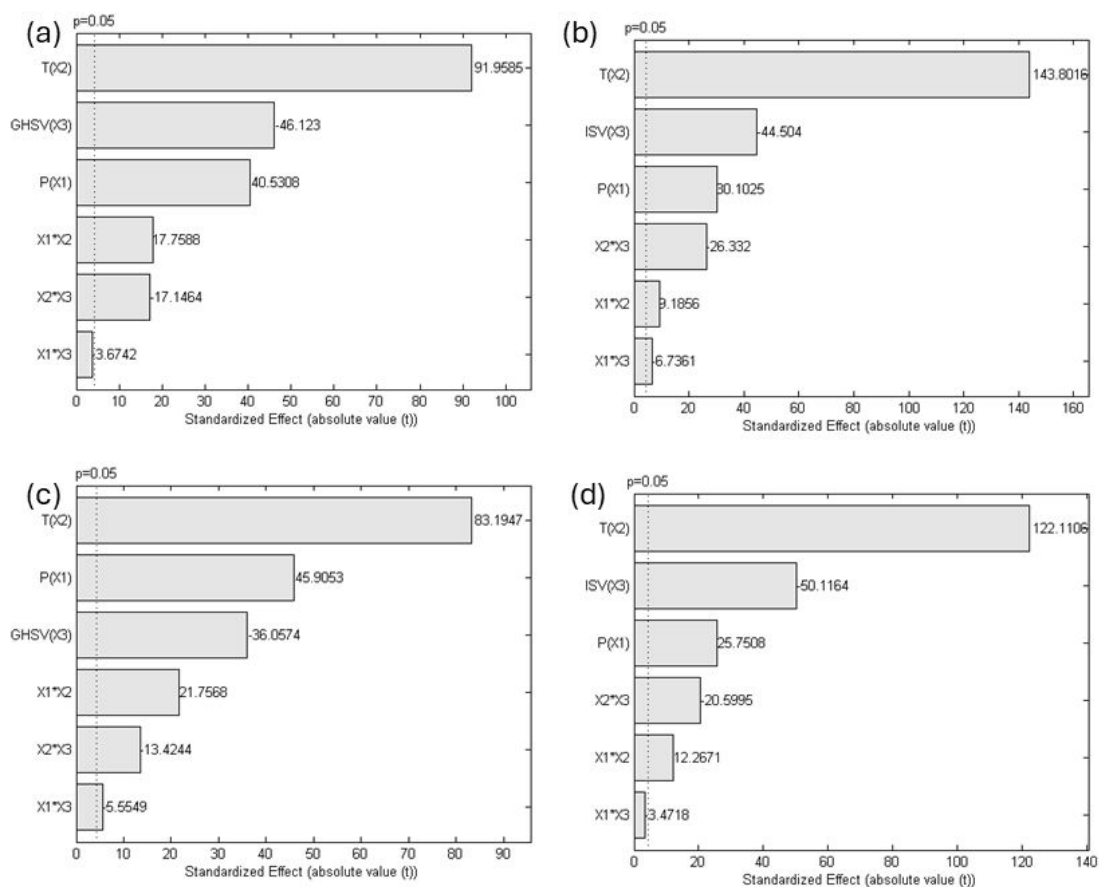

**Figure S3.** Pareto charts of the standardized effects caused by the variation of pressure, temperature, and space velocity on the CO<sub>2</sub> conversion for (a) CuCeIn@mSiO<sub>2</sub>, (b) CuCeIn, (c) CuZrIn@mSiO<sub>2</sub> and (d) CuZrIn catalysts. The analysis was carried out with 95% confidence level.

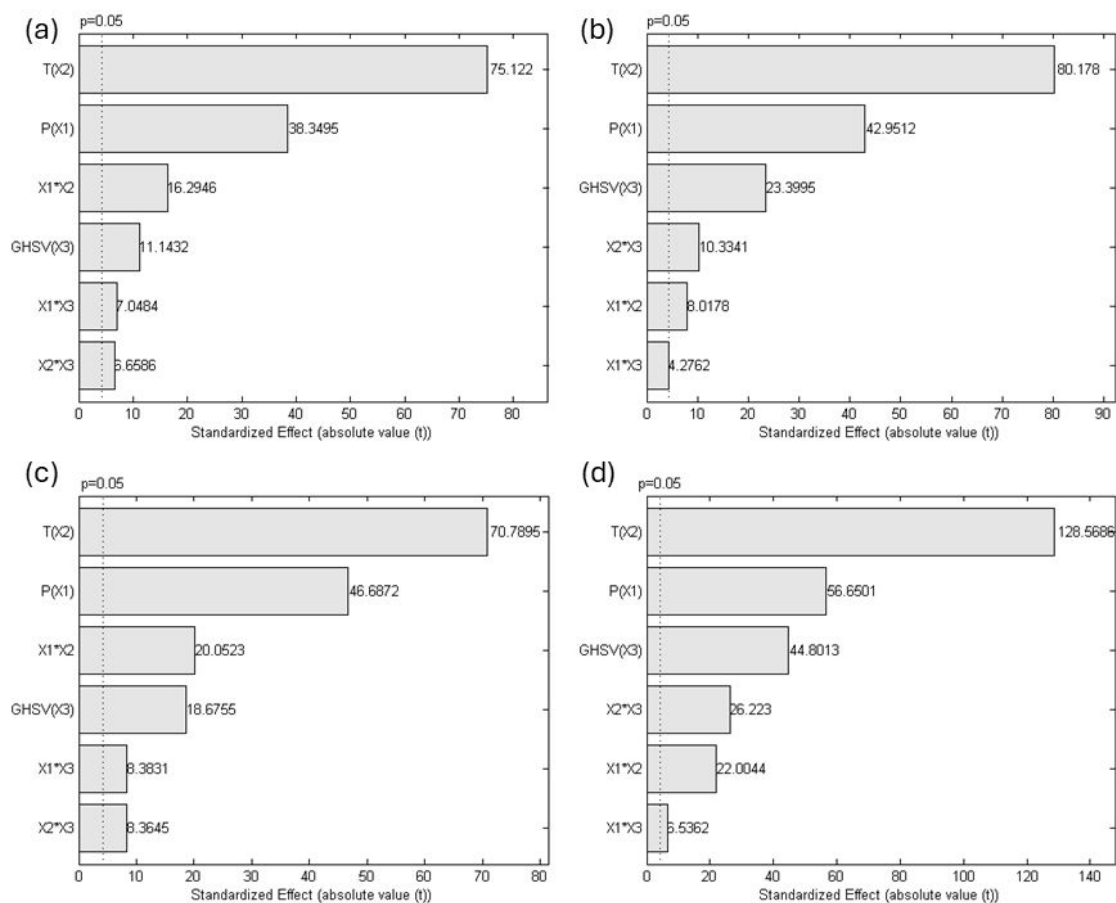

**Figure S4.** Pareto charts of the standardized effects caused by the variation of pressure, temperature, and space velocity on the CH<sub>3</sub>OH space-time yield (STY) for (a) CuCeIn@mSiO<sub>2</sub>, (b) CuCeIn, (c) CuZrIn@mSiO<sub>2</sub> and (d) CuZrIn catalysts. The analysis was carried out with 95% confidence level.

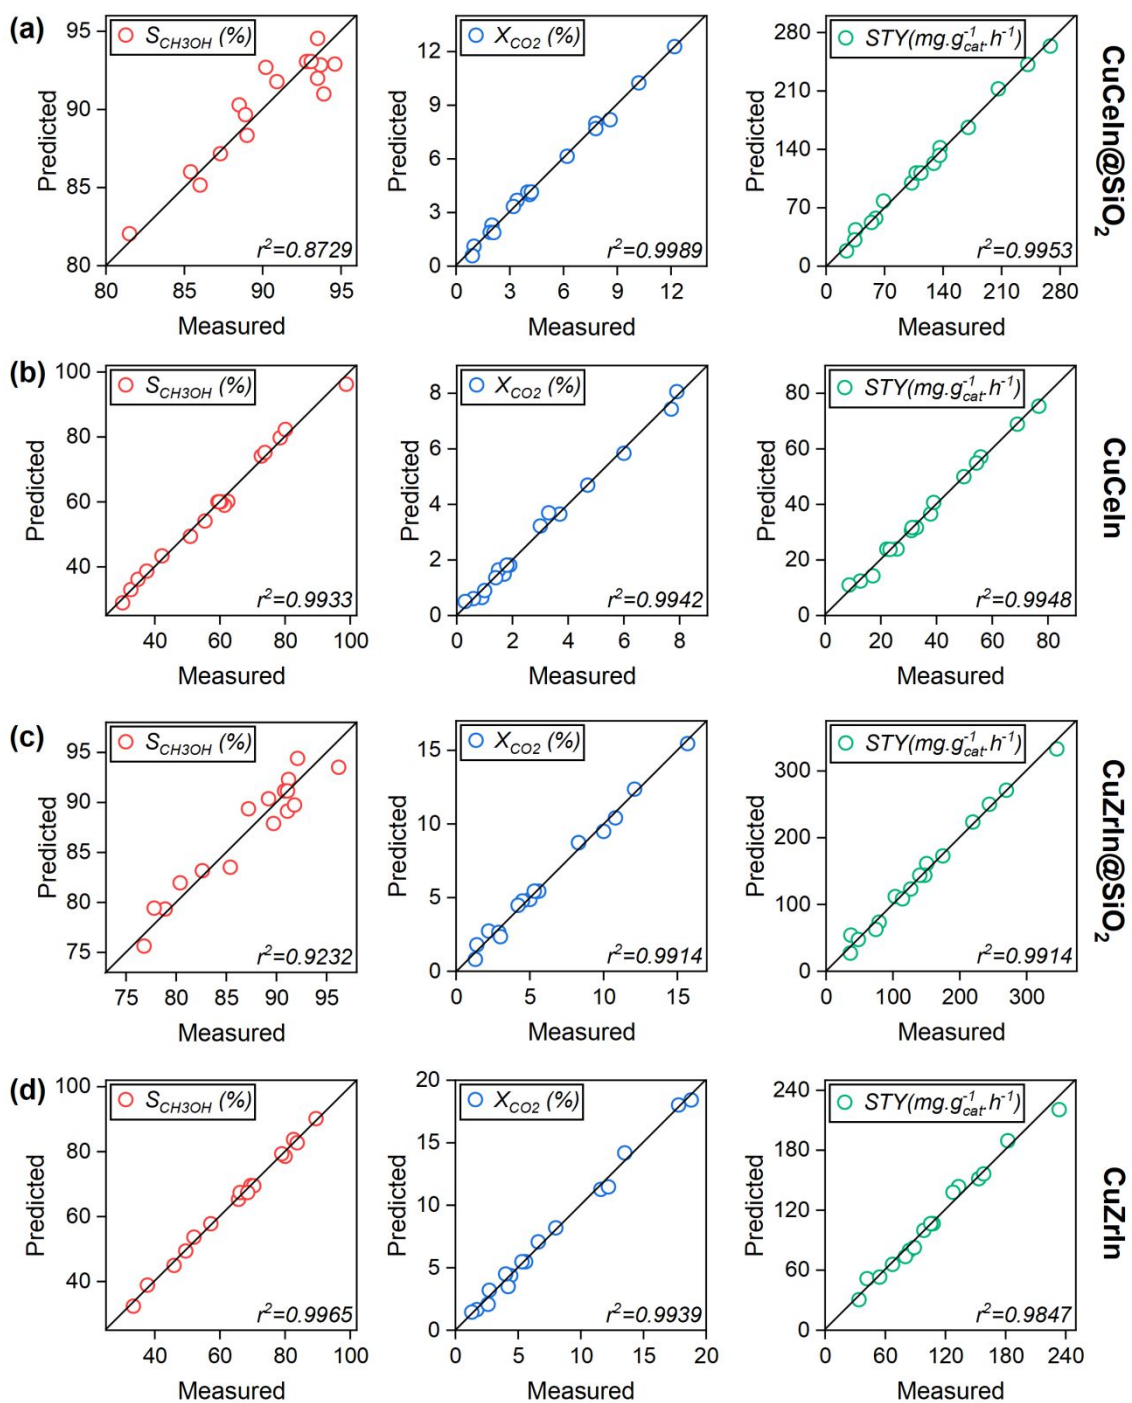

**Figure S5.** Comparison between predicted and measured values of  $CH_3OH$  selectivity,  $CO_2$  conversion and  $CH_3OH$  space-time yield for (a) CuCeIn@mSiO<sub>2</sub>, (b) CuCeIn, (c) CuZrIn@mSiO<sub>2</sub> and (d) CuZrIn catalysts. The predicted values were obtained by adjusting a regression equation based on the quadratic model. The experimental conditions applied are the same as described in Figure 2.

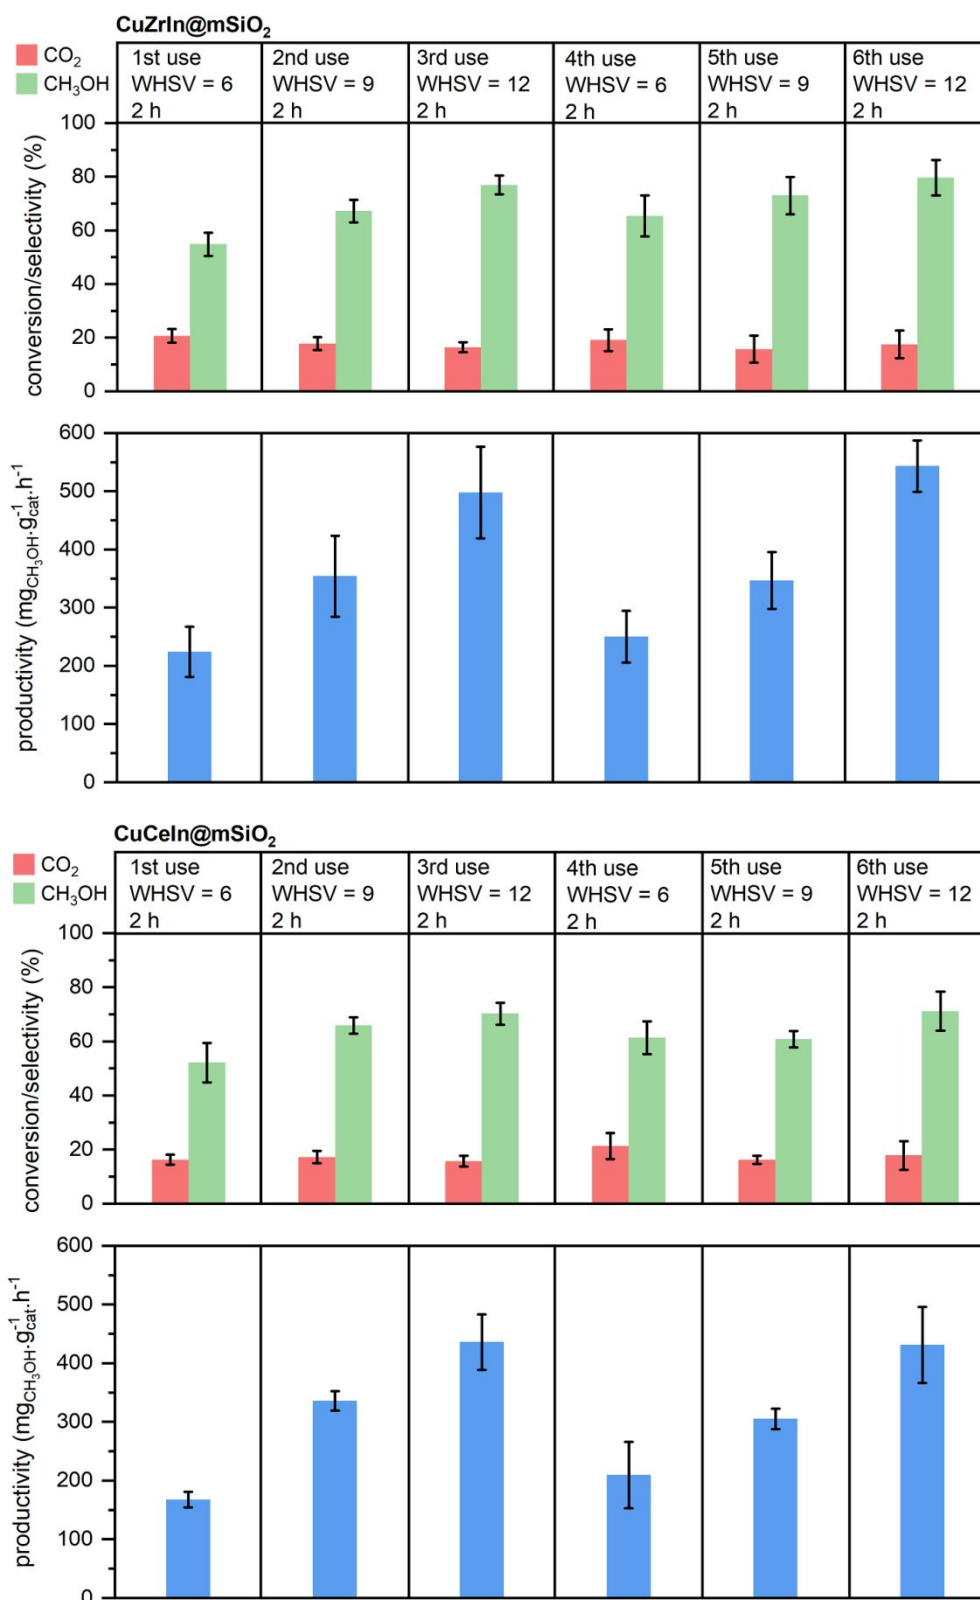

**Figure S6.** Catalytic activity in terms of CO<sub>2</sub> conversion, CH<sub>3</sub>OH selectivity and productivity during reuse tests. Before each use catalysts were reduced in H<sub>2</sub> (30 mL·min<sup>-1</sup>) for 1 h at 573 K. WHSV values in the figure are in L·g<sup>-1</sup>·h<sup>-1</sup>.

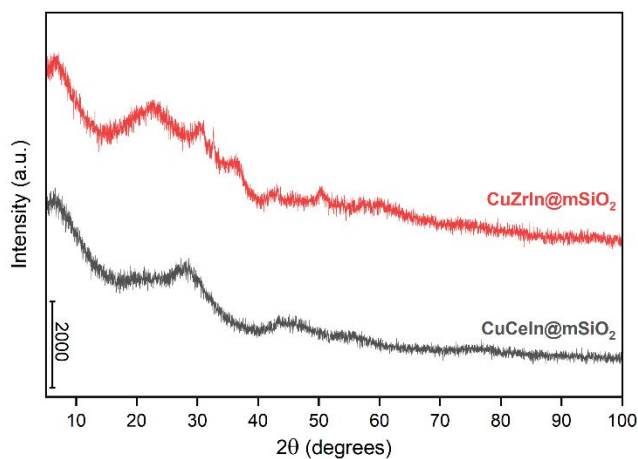

**Figure S7.** XRD diffraction patterns of spent catalysts.

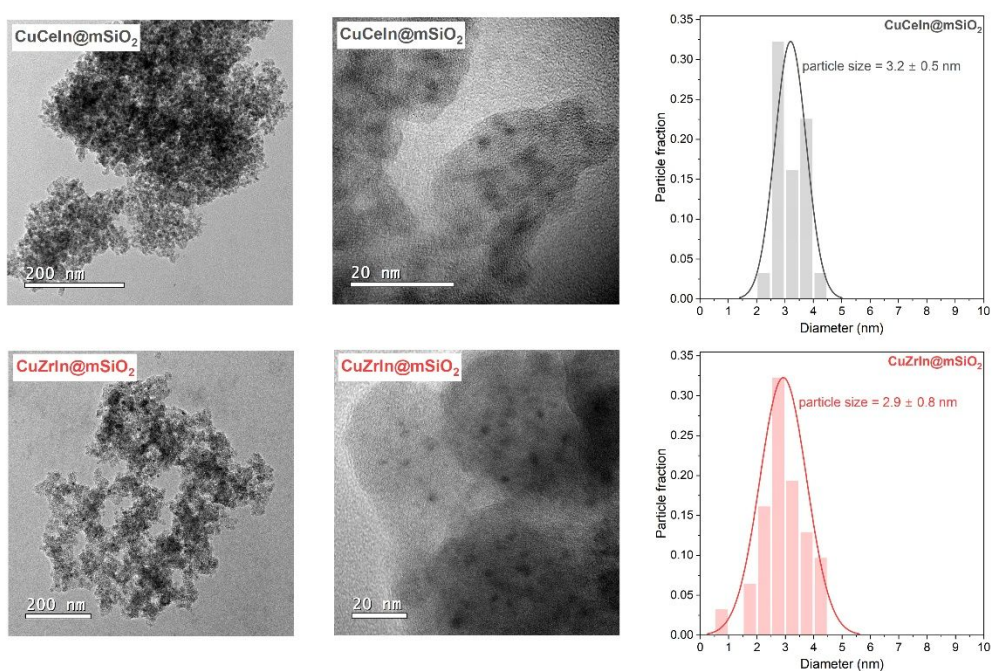

**Figure S8.** Transmission Electron Microscopy (TEM) images of spent catalysts.

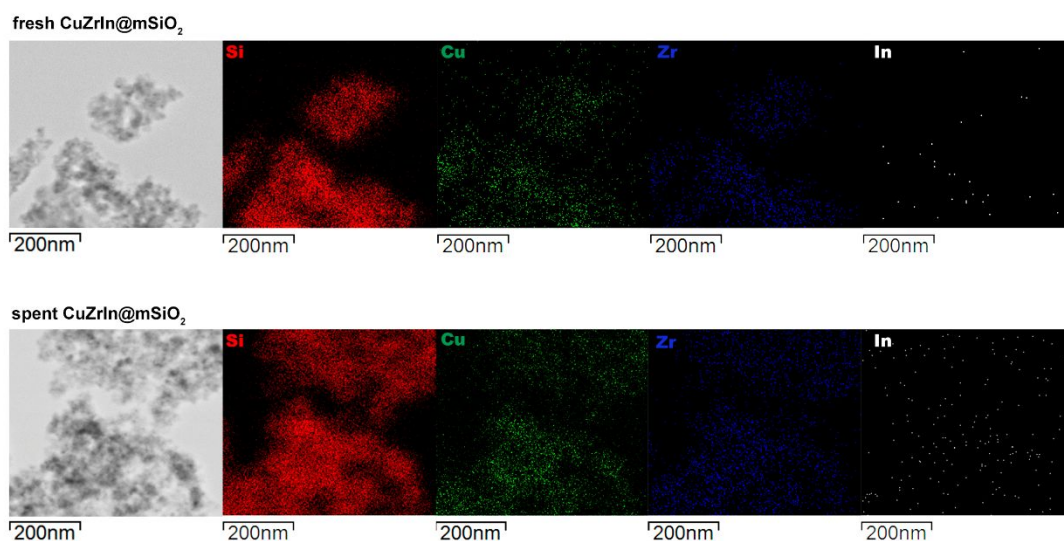

**Figure S9.** Elemental mappings obtained through Energy Dispersive Spectroscopy (EDS) of fresh and spent CuZrIn@mSiO<sub>2</sub> catalyst.

## Supplementary Tables

**Table S1.** Metallic surface area and basicity normalized by the amount of active phases in catalysts.

| Catalyst                 | Specific basicity ( $\text{mmol}_{\text{CO}_2} \cdot \text{g}_{\text{CuZrCeIn}}^{-1}$ ) | Specific metallic surface area ( $\text{m}_{\text{Cu}}^2 \cdot \text{g}_{\text{CuZrCeIn}}^{-1}$ ) |
|--------------------------|-----------------------------------------------------------------------------------------|---------------------------------------------------------------------------------------------------|
| CuCeIn@mSiO <sub>2</sub> | 1.340                                                                                   | 67.9                                                                                              |
| CuCeIn                   | 0.242                                                                                   | 10.5                                                                                              |
| CuZrIn@mSiO <sub>2</sub> | 0.866                                                                                   | 94.2                                                                                              |
| CuZrIn                   | 0.126                                                                                   | 20.3                                                                                              |

**Table S2.** Values defined for the minimum, maximum, average, minimum axial and maximum axial points of the pressure, temperature, and space velocity parameters.

| <b>Variable</b>                               | <b>Minimum<br/>point (-1)</b> | <b>Maximum<br/>point (+1)</b> | <b>Central<br/>point (0)</b> | <b>Minimum<br/>axis point (-<br/>1,68)</b> | <b>Maximum<br/>axis point<br/>(+1,68)</b> |
|-----------------------------------------------|-------------------------------|-------------------------------|------------------------------|--------------------------------------------|-------------------------------------------|
| P (MPa)                                       | 2.0                           | 3.0                           | 2.5                          | 1.7                                        | 3.3                                       |
| T (K)                                         | 473                           | 523                           | 498                          | 456                                        | 540                                       |
| WHSV<br>(L.g <sup>-1</sup> .h <sup>-1</sup> ) | 6.00                          | 12.00                         | 9.00                         | 3.95                                       | 14.05                                     |

**Table S3.** Matrix of experiments defined by the Central Composite experimental planning methodology based on combinations between minimum, maximum, average, and axial points of each parameter.

| <b>Test</b> | <b>P (MPa)</b> | <b>T (K)</b> | <b>WHSV (L.g<sup>-1</sup>.h<sup>-1</sup>)</b> |
|-------------|----------------|--------------|-----------------------------------------------|
| 1           | 2.0            | 473          | 6.00                                          |
| 2           | 2.0            | 473          | 12.00                                         |
| 3           | 2.0            | 523          | 6.00                                          |
| 4           | 2.0            | 523          | 12.00                                         |
| 5           | 3.0            | 473          | 6.00                                          |
| 6           | 3.0            | 473          | 12.00                                         |
| 7           | 3.0            | 523          | 6.00                                          |
| 8           | 3.0            | 523          | 12.00                                         |
| 9           | 1.7            | 498          | 9.00                                          |
| 10          | 3.3            | 498          | 9.00                                          |
| 11          | 2.5            | 456          | 9.00                                          |
| 12          | 2.5            | 540          | 9.00                                          |
| 13          | 2.5            | 498          | 3.95                                          |
| 14          | 2.5            | 498          | 14.05                                         |
| 15          | 2.5            | 498          | 9.00                                          |
| 16          | 2.5            | 498          | 9.00                                          |
| 17          | 2.5            | 498          | 9.00                                          |



**Table S4.** Catalytic results for CuZrIn@mSiO<sub>2</sub> catalyst based on the experimental matrix of Table S4.

| Test | P (MPa) | T (K) | WHSV (L.g <sup>-1</sup> .h <sup>-1</sup> ) | X <sub>CO2</sub> (%) | S <sub>CH3OH</sub> (%) | S <sub>CO</sub> (%) | S <sub>CH4</sub> (%) | S <sub>C2H6</sub> (%) |
|------|---------|-------|--------------------------------------------|----------------------|------------------------|---------------------|----------------------|-----------------------|
| 1    | 2.0     | 473   | 6.00                                       | 2.2                  | 87.2                   | 4.8                 | 7.4                  | 0.6                   |
| 2    | 2.0     | 473   | 12.00                                      | 1.4                  | 89.2                   | 3.8                 | 6.6                  | 0.4                   |
| 3    | 2.0     | 523   | 6.00                                       | 8.3                  | 78.9                   | 9.8                 | 9.5                  | 1.8                   |
| 4    | 2.0     | 523   | 12.00                                      | 5.0                  | 77.8                   | 11.2                | 9.6                  | 1.4                   |
| 5    | 3.0     | 473   | 6.00                                       | 4.5                  | 91.2                   | 3.7                 | 4.2                  | 0.9                   |
| 6    | 3.0     | 473   | 12.00                                      | 2.9                  | 92.1                   | 3.6                 | 3.7                  | 0.6                   |
| 7    | 3.0     | 523   | 6.00                                       | 15.7                 | 80.4                   | 15.0                | 2.7                  | 1.9                   |
| 8    | 3.0     | 523   | 12.00                                      | 10.8                 | 82.6                   | 13.2                | 2.9                  | 1.3                   |
| 9    | 1.7     | 498   | 9.00                                       | 3.0                  | 85.4                   | 5.3                 | 8.3                  | 1.0                   |
| 10   | 3.3     | 498   | 9.00                                       | 8.3                  | 91.1                   | 5.4                 | 2.6                  | 0.9                   |
| 11   | 2.5     | 456   | 9.00                                       | 1.3                  | 96.2                   | 2.0                 | 1.5                  | 0.3                   |
| 12   | 2.5     | 540   | 9.00                                       | 12.1                 | 76.8                   | 12.1                | 9.1                  | 2.0                   |
| 13   | 2.5     | 498   | 3.95                                       | 10.0                 | 89.7                   | 5.1                 | 3.6                  | 1.6                   |
| 14   | 2.5     | 498   | 14.05                                      | 4.2                  | 91.8                   | 4.4                 | 3.1                  | 0.7                   |
| 15   | 2.5     | 498   | 9.00                                       | 5.4                  | 90.9                   | 4.7                 | 3.4                  | 1.0                   |
| 16   | 2.5     | 498   | 9.00                                       | 5.6                  | 90.5                   | 5.0                 | 3.1                  | 1.2                   |
| 17   | 2.5     | 498   | 9.00                                       | 5.3                  | 91.1                   | 4.2                 | 3.8                  | 1.0                   |

**Table S5.** Catalytic results for CuZrIn catalyst based on the experimental matrix of Table S4.

| Test | P (MPa) | T (K) | WHSV (L.g <sup>-1</sup> .h <sup>-1</sup> ) | X <sub>CO2</sub> (%) | S <sub>CH3OH</sub> (%) | S <sub>CO</sub> (%) | S <sub>CH4</sub> (%) | S <sub>C2H6</sub> (%) |
|------|---------|-------|--------------------------------------------|----------------------|------------------------|---------------------|----------------------|-----------------------|
| 1    | 2.0     | 473   | 6.00                                       | 2.7                  | 80.0                   | 19.7                | 0.1                  | 0.2                   |
| 2    | 2.0     | 473   | 12.00                                      | 1.7                  | 82.6                   | 17.1                | 0.1                  | 0.2                   |
| 3    | 2.0     | 523   | 6.00                                       | 13.5                 | 37.7                   | 62.1                | 0.2                  | 0.0                   |
| 4    | 2.0     | 523   | 12.00                                      | 8.0                  | 49.5                   | 50.3                | 0.2                  | 0.0                   |
| 5    | 3.0     | 473   | 6.00                                       | 4.4                  | 79.0                   | 20.8                | 0.1                  | 0.1                   |
| 6    | 3.0     | 473   | 12.00                                      | 2.6                  | 83.7                   | 16.0                | 0.1                  | 0.2                   |
| 7    | 3.0     | 523   | 6.00                                       | 17.8                 | 45.9                   | 54.0                | 0.1                  | 0.0                   |
| 8    | 3.0     | 523   | 12.00                                      | 11.6                 | 52.0                   | 47.9                | 0.1                  | 0.0                   |
| 9    | 1.7     | 498   | 9.00                                       | 4.2                  | 65.7                   | 34.1                | 0.1                  | 0.1                   |
| 10   | 3.3     | 498   | 9.00                                       | 6.6                  | 69.5                   | 30.3                | 0.1                  | 0.1                   |
| 11   | 2.5     | 456   | 9.00                                       | 1.3                  | 89.5                   | 10.2                | 0.0                  | 0.3                   |
| 12   | 2.5     | 540   | 9.00                                       | 18.8                 | 33.4                   | 66.4                | 0.2                  | 0.0                   |
| 13   | 2.5     | 498   | 3.95                                       | 12.2                 | 57.2                   | 42.7                | 0.1                  | 0.0                   |
| 14   | 2.5     | 498   | 14.05                                      | 4.0                  | 70.4                   | 29.4                | 0.1                  | 0.1                   |
| 15   | 2.5     | 498   | 9.00                                       | 5.5                  | 67.5                   | 32.3                | 0.1                  | 0.1                   |
| 16   | 2.5     | 498   | 9.00                                       | 5.6                  | 66.2                   | 33.5                | 0.2                  | 0.1                   |
| 17   | 2.5     | 498   | 9.00                                       | 5.3                  | 68.5                   | 31.3                | 0.1                  | 0.1                   |

**Table S6.** Catalytic results for CuCeIn@mSiO<sub>2</sub> catalyst based on the experimental matrix of Table S4.

| Test | P (MPa) | T (K) | WHSV (L.g <sup>-1</sup> .h <sup>-1</sup> ) | X <sub>CO2</sub> (%) | S <sub>CH3OH</sub> (%) | S <sub>CO</sub> (%) | S <sub>CH4</sub> (%) | S <sub>C2H6</sub> (%) |
|------|---------|-------|--------------------------------------------|----------------------|------------------------|---------------------|----------------------|-----------------------|
| 1    | 2.0     | 473   | 6.00                                       | 2.0                  | 90.9                   | 3.2                 | 5.7                  | 0.2                   |
| 2    | 2.0     | 473   | 12.00                                      | 1.0                  | 88.5                   | 3.6                 | 6.5                  | 1.4                   |
| 3    | 2.0     | 523   | 6.00                                       | 7.8                  | 85.4                   | 11.6                | 3.0                  | 0.0                   |
| 4    | 2.0     | 523   | 12.00                                      | 4.1                  | 86.0                   | 11.0                | 3.0                  | 0.0                   |
| 5    | 3.0     | 473   | 6.00                                       | 3.4                  | 90.2                   | 3.8                 | 5.3                  | 0.7                   |
| 6    | 3.0     | 473   | 12.00                                      | 1.9                  | 93.5                   | 2.0                 | 4.4                  | 0.1                   |
| 7    | 3.0     | 523   | 6.00                                       | 12.2                 | 87.3                   | 10.4                | 2.3                  | 0.0                   |
| 8    | 3.0     | 523   | 12.00                                      | 7.8                  | 88.9                   | 9.0                 | 2.1                  | 0.0                   |
| 9    | 1.7     | 498   | 9.00                                       | 2.1                  | 89.0                   | 7.0                 | 4.0                  | 0.0                   |
| 10   | 3.3     | 498   | 9.00                                       | 6.2                  | 94.6                   | 3.1                 | 2.3                  | 0.0                   |
| 11   | 2.5     | 456   | 9.00                                       | 0.9                  | 93.9                   | 1.4                 | 2.7                  | 2.0                   |
| 12   | 2.5     | 540   | 9.00                                       | 10.2                 | 81.5                   | 15.5                | 3.0                  | 0.0                   |
| 13   | 2.5     | 498   | 3.95                                       | 8.6                  | 93.5                   | 3.9                 | 2.6                  | 0.0                   |
| 14   | 2.5     | 498   | 14.05                                      | 3.2                  | 93.7                   | 3.7                 | 2.6                  | 0.0                   |
| 15   | 2.5     | 498   | 9.00                                       | 4.2                  | 93.0                   | 4.2                 | 2.9                  | 0.0                   |
| 16   | 2.5     | 498   | 9.00                                       | 4.0                  | 93.4                   | 4.2                 | 3.0                  | 0.0                   |
| 17   | 2.5     | 498   | 9.00                                       | 4.2                  | 94.1                   | 3.7                 | 3.2                  | 0.0                   |

**Table S7.** Catalytic results for CuCeIn catalyst based on the experimental matrix of Table S4.

| Test | P (MPa) | T (K) | WHSV (L.g <sup>-1</sup> .h <sup>-1</sup> ) | X <sub>CO2</sub> (%) | S <sub>CH3OH</sub> (%) | S <sub>CO</sub> (%) | S <sub>CH4</sub> (%) | S <sub>C2H6</sub> (%) |
|------|---------|-------|--------------------------------------------|----------------------|------------------------|---------------------|----------------------|-----------------------|
| 1    | 2.0     | 473   | 6.00                                       | 0.9                  | 72.7                   | 26.5                | 0.5                  | 0.3                   |
| 2    | 2.0     | 473   | 12.00                                      | 0.6                  | 73.8                   | 25.3                | 0.4                  | 0.5                   |
| 3    | 2.0     | 523   | 6.00                                       | 6.0                  | 32.6                   | 66.8                | 0.5                  | 0.1                   |
| 4    | 2.0     | 523   | 12.00                                      | 3.7                  | 34.8                   | 64.7                | 0.4                  | 0.1                   |
| 5    | 3.0     | 473   | 6.00                                       | 1.7                  | 78.5                   | 20.6                | 0.5                  | 0.4                   |
| 6    | 3.0     | 473   | 12.00                                      | 1.0                  | 80.1                   | 19.2                | 0.3                  | 0.4                   |
| 7    | 3.0     | 523   | 6.00                                       | 7.7                  | 37.5                   | 61.9                | 0.5                  | 0.1                   |
| 8    | 3.0     | 523   | 12.00                                      | 4.7                  | 42.2                   | 57.3                | 0.4                  | 0.1                   |
| 9    | 1.7     | 498   | 9.00                                       | 1.5                  | 50.9                   | 48.5                | 0.5                  | 0.1                   |
| 10   | 3.3     | 498   | 9.00                                       | 3.0                  | 62.4                   | 37.1                | 0.4                  | 0.1                   |
| 11   | 2.5     | 456   | 9.00                                       | 0.3                  | 98.8                   | 0.0                 | 0.2                  | 1.0                   |
| 12   | 2.5     | 540   | 9.00                                       | 7.9                  | 30.1                   | 69.2                | 0.7                  | 0.0                   |
| 13   | 2.5     | 498   | 3.95                                       | 3.3                  | 55.4                   | 44.0                | 0.5                  | 0.1                   |
| 14   | 2.5     | 498   | 14.05                                      | 1.4                  | 61.4                   | 37.9                | 0.5                  | 0.2                   |
| 15   | 2.5     | 498   | 9.00                                       | 1.8                  | 60.3                   | 39.0                | 0.5                  | 0.2                   |
| 16   | 2.5     | 498   | 9.00                                       | 1.9                  | 59.4                   | 40.0                | 0.4                  | 0.2                   |
| 17   | 2.5     | 498   | 9.00                                       | 1.8                  | 59.8                   | 39.6                | 0.4                  | 0.2                   |

**Table S8.** Catalytic performance of Cu-based materials during CO<sub>2</sub> hydrogenation to methanol reported in the literature.

| Catalyst                                                               | Content (wt. %) |       | Reaction conditions |       |                                                              | Catalytic performance |                       |                                                                                           | Ref.      |
|------------------------------------------------------------------------|-----------------|-------|---------------------|-------|--------------------------------------------------------------|-----------------------|-----------------------|-------------------------------------------------------------------------------------------|-----------|
|                                                                        | Cu              | In    | P (MPa)             | T (K) | WHSV<br>(L·g <sub>cat</sub> <sup>-1</sup> ·h <sup>-1</sup> ) | X <sub>CO2</sub> (%)  | S <sub>MeOH</sub> (%) | Space-time yield<br>(g <sub>MeOH</sub> ·g <sub>cat</sub> <sup>-1</sup> ·h <sup>-1</sup> ) |           |
| In <sub>2</sub> O <sub>3</sub>                                         | -               | 41.0  | 4.0                 | 603   | 15.0                                                         | 7.1                   | 39.7                  | 0.118                                                                                     | 1         |
| Cu/In <sub>2</sub> O <sub>3</sub>                                      | 3.9             | ~39.5 | 5.0                 | 573   | 6.0                                                          | ~17.0                 | ~45.0                 | 0.140                                                                                     | 2         |
| Cu/CeO <sub>2</sub> (sphere)                                           | 5.0             | -     | 3.0                 | 523   | 30.0                                                         | 1.5                   | 52.0                  | 0.064                                                                                     | 3         |
| Cu/ZrO <sub>2</sub>                                                    | 5.0             | -     | 0.1                 | 493   | 75.0                                                         | 0.53                  | 19.8                  | 0.022                                                                                     | 4         |
| Cu/ZrO <sub>2</sub>                                                    | 10              | -     | 3.0                 | 553   | 7.2                                                          | 12.1                  | 31.0                  | 0.096                                                                                     | 5         |
| Cu/In <sub>2</sub> O <sub>3</sub> /CeO <sub>2</sub>                    | 4.6             | 0.9   | 3.0                 | 483   | 7.2                                                          | ~7.5                  | 95                    | 0.023                                                                                     | 6         |
| Cu/In <sub>2</sub> O <sub>3</sub> /ZrO <sub>2</sub>                    | 22.1            | 3.11  | 3.0                 | 543   | 18.0                                                         | ~16.0                 | ~35.0                 | 0.398                                                                                     | 7         |
| Cu <sub>0.25</sub> In <sub>0.75</sub> Zr <sub>0.5</sub> O              | 17.9            | 45.5  | 2.5                 | 523   | 18.0                                                         | 1.5                   | 79.7                  | 0.075                                                                                     | 8         |
| Cu@SiO <sub>2</sub>                                                    | 8.0             | -     | 3.0                 | 553   | 7.5                                                          | 6.5                   | 54.2                  | 0.077                                                                                     | 9         |
| In <sub>2</sub> O <sub>3</sub> @SiO <sub>2</sub>                       | -               | 6.6   | 3.0                 | 553   | 7.5                                                          | 4.3                   | 89.0                  | 0.082                                                                                     | 9         |
| Cu/In <sub>2</sub> O <sub>3</sub> @SiO <sub>2</sub>                    | 8.0             | 6.6   | 3.0                 | 553   | 7.5                                                          | 12.5                  | 78.2                  | 0.210                                                                                     | 9         |
| Cu/ZnO@mSiO <sub>2</sub>                                               | 11.7            | -     | 5.0                 | 523   | 6.0                                                          | 9.8                   | 66.6                  | 0.136                                                                                     | 10        |
| Cu-CeO <sub>2</sub> -ZnO/MV <sub>m</sub> SiO <sub>2</sub>              | 4.0             | -     | 3.0                 | 553   | 18.0                                                         | -                     | ~18.0                 | 0.046                                                                                     | 11        |
| Cu-ZrO <sub>2</sub> -ZnO/MV <sub>m</sub> SiO <sub>2</sub>              | 4.5             | -     | 3.0                 | 553   | 18.0                                                         | -                     | ~27.0                 | 0.059                                                                                     | 11        |
| Cu/ZrO <sub>2</sub> /In <sub>2</sub> O <sub>3</sub> @mSiO <sub>2</sub> | 6.5             | 1.1   | 3.0                 | 523   | 12.0                                                         | 10.8                  | 82.6                  | 0.345                                                                                     | This work |
| Cu/CeO <sub>2</sub> /In <sub>2</sub> O <sub>3</sub> @mSiO <sub>2</sub> | 5.6             | 0.8   | 3.0                 | 523   | 12.0                                                         | 7.8                   | 88.9                  | 0.268                                                                                     | This work |

**Table S9.** Main effects in CH<sub>3</sub>OH selectivity by changing pressure, temperature and space velocity and the combination of these variables in CuZrIn@mSiO<sub>2+</sub> catalyst.

| Variable                        | Effect   | Error  | Standardized effect (t) | Significant |
|---------------------------------|----------|--------|-------------------------|-------------|
| Pressure (X <sub>1</sub> )      | 3.3370   | 0.1653 | 20.1827                 | yes         |
| Temperature (X <sub>2</sub> )   | -10.6359 | 0.1653 | -64.3284                | yes         |
| GHSV (X <sub>3</sub> )          | 1.1030   | 0.1653 | 6.6712                  | yes         |
| X <sub>1</sub> × X <sub>2</sub> | -0.1500  | 0.2160 | -0.6944                 | no          |
| X <sub>1</sub> × X <sub>3</sub> | 0.5500   | 0.2160 | 2.5460                  | no          |
| X <sub>2</sub> × X <sub>3</sub> | -0.4500  | 0.2160 | -2.0831                 | no          |

**Table S10.** Main effects in CH<sub>3</sub>OH selectivity by changing pressure, temperature and space velocity and the combination of these variables in CuZrIn catalyst.

| Variable                        | Effect   | Error  | Standardized effect (t) | Significant |
|---------------------------------|----------|--------|-------------------------|-------------|
| Pressure (X <sub>1</sub> )      | 2.5175   | 0.6241 | 4.0336                  | no          |
| Temperature (X <sub>2</sub> )   | -34.3488 | 0.6241 | -55.0341                | yes         |
| GHSV (X <sub>3</sub> )          | 6.9415   | 0.6241 | 11.1218                 | yes         |
| X <sub>1</sub> × X <sub>2</sub> | 2.6500   | 0.8155 | 3.2496                  | no          |
| X <sub>1</sub> × X <sub>3</sub> | -0.9000  | 0.8155 | -1.1037                 | no          |
| X <sub>2</sub> × X <sub>3</sub> | 2.6500   | 0.8155 | 3.2496                  | no          |

**Table S11.** Main effects in CH<sub>3</sub>OH selectivity by changing pressure, temperature and space velocity and the combination of these variables in CuCeIn@mSiO<sub>2</sub> catalyst.

| Variable                        | Effect  | Error  | Standardized effect (t) | Significant |
|---------------------------------|---------|--------|-------------------------|-------------|
| Pressure (X <sub>1</sub> )      | 2.7119  | 0.3013 | 8.9999                  | yes         |
| Temperature (X <sub>2</sub> )   | -5.3240 | 0.3013 | -17.6685                | yes         |
| GHSV (X <sub>3</sub> )          | 0.5032  | 0.3013 | 1.6701                  | no          |
| X <sub>1</sub> × X <sub>2</sub> | 0.1250  | 0.3937 | 0.3175                  | no          |
| X <sub>1</sub> × X <sub>3</sub> | 1.6750  | 0.3937 | 4.2545                  | no          |
| X <sub>2</sub> × X <sub>3</sub> | 0.3250  | 0.3937 | 0.8255                  | no          |

**Table S12.** Main effects in CH<sub>3</sub>OH selectivity by changing pressure, temperature and space velocity and the combination of these variables in CuCeIn.

| Variable                        | Effect   | Error  | Standardized effect (t) | Significant |
|---------------------------------|----------|--------|-------------------------|-------------|
| Pressure (X <sub>1</sub> )      | 6.4057   | 0.2440 | 26.2485                 | yes         |
| Temperature (X <sub>2</sub> )   | -40.0589 | 0.2440 | -164.1496               | yes         |
| GHSV (X <sub>3</sub> )          | 2.8836   | 0.2440 | 11.8163                 | yes         |
| X <sub>1</sub> × X <sub>2</sub> | 0.0500   | 0.3189 | 0.1568                  | no          |
| X <sub>1</sub> × X <sub>3</sub> | 0.7500   | 0.3189 | 2.3522                  | no          |
| X <sub>2</sub> × X <sub>3</sub> | 1.0500   | 0.3189 | 3.2931                  | no          |

**Table S13.** Main effects in CO<sub>2</sub> conversion by changing pressure, temperature and space velocity and the combination of these variables in CuZrIn@mSiO<sub>2+</sub> catalyst.

| Variable              | Effect  | Error  | Standardized effect (t) | Significant |
|-----------------------|---------|--------|-------------------------|-------------|
| Pressure ( $X_1$ )    | 3.7949  | 0.0827 | 45.9053                 | yes         |
| Temperature ( $X_2$ ) | 6.8776  | 0.0827 | 83.1947                 | yes         |
| GHSV ( $X_3$ )        | -2.9808 | 0.0827 | -36.0574                | yes         |
| $X_1 \times X_2$      | 2.3500  | 0.1080 | 21.7568                 | yes         |
| $X_1 \times X_3$      | -0.6000 | 0.1080 | -5.5549                 | yes         |
| $X_2 \times X_3$      | -1.4500 | 0.1080 | -13.4244                | yes         |

**Table S14.** Main effects in CO<sub>2</sub> conversion by changing pressure, temperature and space velocity and the combination of these variables in CuZrIn catalyst.

| Variable              | Effect  | Error  | Standardized effect (t) | Significant |
|-----------------------|---------|--------|-------------------------|-------------|
| Pressure ( $X_1$ )    | 2.1288  | 0.0827 | 25.7508                 | yes         |
| Temperature ( $X_2$ ) | 10.0948 | 0.0827 | 122.1106                | yes         |
| GHSV ( $X_3$ )        | -4.1431 | 0.0827 | -50.1164                | yes         |
| $X_1 \times X_2$      | 1.3250  | 0.1080 | 12.2671                 | yes         |
| $X_1 \times X_3$      | -0.3750 | 0.1080 | -3.4718                 | no          |
| $X_2 \times X_3$      | -2.2250 | 0.1080 | -20.5995                | yes         |

**Table S15.** Main effects in CO<sub>2</sub> conversion by changing pressure, temperature and space velocity and the combination of these variables in CuCeIn@mSiO<sub>2+</sub> catalyst.

| Variable              | Effect  | Error  | Standardized effect (t) | Significant |
|-----------------------|---------|--------|-------------------------|-------------|
| Pressure ( $X_1$ )    | 2.5328  | 0.0625 | 40.5308                 | yes         |
| Temperature ( $X_2$ ) | 5.7467  | 0.0625 | 91.9585                 | yes         |
| GHSV ( $X_3$ )        | -2.8823 | 0.0625 | -46.1230                | yes         |
| $X_1 \times X_2$      | 1.4500  | 0.0816 | 17.7588                 | yes         |
| $X_1 \times X_3$      | -0.3000 | 0.0816 | -3.6742                 | no          |
| $X_2 \times X_3$      | -1.4000 | 0.0816 | -17.1464                | yes         |

**Table S16.** Main effects in CO<sub>2</sub> conversion by changing pressure, temperature and space velocity and the combination of these variables in CuCeIn catalyst.

| Variable              | Effect  | Error  | Standardized effect (t) | Significant |
|-----------------------|---------|--------|-------------------------|-------------|
| Pressure ( $X_1$ )    | 0.9406  | 0.0312 | 30.1025                 | yes         |
| Temperature ( $X_2$ ) | 4.4932  | 0.0312 | 143.8016                | yes         |
| GHSV ( $X_3$ )        | -1.3906 | 0.0312 | -44.5040                | yes         |
| $X_1 \times X_2$      | 0.3750  | 0.0408 | 9.1856                  | yes         |
| $X_1 \times X_3$      | -0.2750 | 0.0408 | -6.7361                 | yes         |
| $X_2 \times X_3$      | -1.0750 | 0.0408 | -26.3320                | yes         |

**Table S17.** Main effects in CH<sub>3</sub>OH productivity by changing pressure, temperature and space velocity and the combination of these variables in CuZrIn@mSiO<sub>2+</sub> catalyst.

| Variable           | Effect  | Error  | Standardized effect (t) | Significant |
|--------------------|---------|--------|-------------------------|-------------|
| Pressure ( $X_1$ ) | 95.6923 | 2.0496 | 46.6872                 | yes         |

|                       |          |        |         |     |
|-----------------------|----------|--------|---------|-----|
| Temperature ( $X_2$ ) | 145.0938 | 2.0496 | 70.7895 | yes |
| GHSV ( $X_3$ )        | 38.2783  | 2.0496 | 18.6755 | yes |
| $X_1 \times X_2$      | 53.7000  | 2.6780 | 20.0523 | yes |
| $X_1 \times X_3$      | 22.4500  | 2.6780 | 8.3831  | yes |
| $X_2 \times X_3$      | 22.4000  | 2.6780 | 8.3645  | yes |

**Table S18.** Main effects in CH<sub>3</sub>OH productivity by changing pressure, temperature and space velocity and the combination of these variables in CuZrIn catalyst.

| Variable              | Effect  | Error  | Standardized effect (t) | Significant |
|-----------------------|---------|--------|-------------------------|-------------|
| Pressure ( $X_1$ )    | 41.6253 | 0.7348 | 56.6501                 | yes         |
| Temperature ( $X_2$ ) | 94.4695 | 0.7348 | 128.5686                | yes         |
| GHSV ( $X_3$ )        | 32.9191 | 0.7348 | 44.8013                 | yes         |
| $X_1 \times X_2$      | 21.1250 | 0.9600 | 22.0044                 | yes         |
| $X_1 \times X_3$      | 6.2750  | 0.9600 | 6.5362                  | yes         |
| $X_2 \times X_3$      | 25.1750 | 0.9600 | 26.2230                 | yes         |

**Table S19.** Main effects in CH<sub>3</sub>OH productivity by changing pressure, temperature and space velocity and the combination of these variables in CuCeIn@mSiO<sub>2+</sub> catalyst.

| Variable              | Effect   | Error  | Standardized effect (t) | Significant |
|-----------------------|----------|--------|-------------------------|-------------|
| Pressure ( $X_1$ )    | 67.7737  | 1.7673 | 38.3495                 | yes         |
| Temperature ( $X_2$ ) | 132.7604 | 1.7673 | 75.1220                 | yes         |
| GHSV ( $X_3$ )        | 19.6930  | 1.7673 | 11.1432                 | yes         |
| $X_1 \times X_2$      | 37.6250  | 2.3090 | 16.2946                 | yes         |
| $X_1 \times X_3$      | 16.2750  | 2.3090 | 7.0484                  | yes         |
| $X_2 \times X_3$      | 15.3750  | 2.3090 | 6.6586                  | yes         |

**Table S20.** Main effects in CH<sub>3</sub>OH productivity by changing pressure, temperature and space velocity and the combination of these variables in CuCeIn catalyst.

| Variable              | Effect  | Error  | Standardized effect (t) | Significant |
|-----------------------|---------|--------|-------------------------|-------------|
| Pressure ( $X_1$ )    | 18.4502 | 0.4296 | 42.9512                 | yes         |
| Temperature ( $X_2$ ) | 34.4414 | 0.4296 | 80.1780                 | yes         |
| GHSV ( $X_3$ )        | 10.0515 | 0.4296 | 23.3995                 | yes         |
| $X_1 \times X_2$      | 4.5000  | 0.5612 | 8.0178                  | yes         |
| $X_1 \times X_3$      | 2.4000  | 0.5612 | 4.2762                  | no          |
| $X_2 \times X_3$      | 5.8000  | 0.5612 | 10.3341                 | yes         |

**Table S21.** Analysis of variance (ANOVA) for the quadratic model applied using the catalyst CuZrIn@mSiO<sub>2</sub> and the CH<sub>3</sub>OH selectivity results from central composite experimental design.

| Source of variation     | Sum of squares | Degrees of freedom | Mean sum of squares | F-ratio |
|-------------------------|----------------|--------------------|---------------------|---------|
| Regression              | 501.2619       | 9                  | 55.6958             | 9.2401  |
| Residual                | 42.1934        | 7                  | 6.0276              |         |
| Lack-of-fit             | 42.0067        | 5                  | 8.4013              | 90.0145 |
| Pure error              | 0.1867         | 2                  | 0.0933              |         |
| Total                   | 543.4553       | 16                 |                     |         |
| R <sup>2</sup>          | 0.9224         |                    |                     |         |
| Adjusted R <sup>2</sup> | 0.9997         |                    |                     |         |

**Table S22.** Analysis of variance (ANOVA) for the quadratic model applied using the catalyst CuZrIn and the CH<sub>3</sub>OH selectivity results from central composite experimental design.

| Source of variation     | Sum of squares         | Degrees of freedom | Mean sum of squares | F-ratio  |
|-------------------------|------------------------|--------------------|---------------------|----------|
| Regression              | 4,2819x10 <sup>3</sup> | 6                  | 713,6461            | 159,3933 |
| Residual                | 44,7727                | 10                 | 4,4773              | -        |
| Lack-of-fit             | 42,1127                | 8                  | 5,2641              | 3,9580   |
| Pure error              | 2,6600                 | 2                  | 1,3300              | -        |
| Total                   | 4,3266x10 <sup>3</sup> | 16                 |                     |          |
| R <sup>2</sup>          | 0,9897                 |                    |                     |          |
| Adjusted R <sup>2</sup> | 0,9994                 |                    |                     |          |

**Table S23.** Analysis of variance (ANOVA) for the quadratic model applied using the catalyst CuCeIn@mSiO<sub>2</sub> and the CH<sub>3</sub>OH selectivity results from central composite experimental design.

| Source of variation     | Sum of squares | Degrees of freedom | Mean sum of squares | F-ratio |
|-------------------------|----------------|--------------------|---------------------|---------|
| Regression              | 202.5763       | 9                  | 22.5085             | 5.5986  |
| Residual                | 28.1425        | 7                  | 4.0204              |         |
| Lack-of-fit             | 27.5225        | 5                  | 5.5045              | 17.7565 |
| Pure error              | 0.6200         | 2                  | 0.3100              |         |
| Total                   | 230.7188       | 16                 |                     |         |
| R <sup>2</sup>          | 0.8780         |                    |                     |         |
| Adjusted R <sup>2</sup> | 0.9973         |                    |                     |         |

**Table S24.** Analysis of variance (ANOVA) for the quadratic model applied using the catalyst CuCeIn and the CH<sub>3</sub>OH selectivity results from central composite experimental design.

| Source of variation     | Sum of squares         | Degrees of freedom | Mean sum of squares | F-ratio  |
|-------------------------|------------------------|--------------------|---------------------|----------|
| Regression              | 5.7291x10 <sup>3</sup> | 9                  | 636.5698            | 114.6009 |
| Residual                | 38.8827                | 7                  | 5.5547              |          |
| Lack-of-fit             | 38.4760                | 5                  | 7.6952              | 37.8453  |
| Pure error              | 0.4067                 | 2                  | 0.2033              |          |
| Total                   | 5.7680x10 <sup>3</sup> | 16                 |                     |          |
| R <sup>2</sup>          | 0.9933                 |                    |                     |          |
| Adjusted R <sup>2</sup> | 0.9846                 |                    |                     |          |

**Table S25.** Analysis of variance (ANOVA) for the quadratic model applied using the catalyst CuZrIn@mSiO<sub>2</sub> and the CO<sub>2</sub> conversion results from central composite experimental design.

| Source of variation     | Sum of squares | Degrees of freedom | Mean sum of squares | F-ratio |
|-------------------------|----------------|--------------------|---------------------|---------|
| Regression              | 261.4983       | 9                  | 29.0554             | 89.1847 |
| Residual                | 2.2805         | 7                  | 0.3258              |         |
| Lack-of-fit             | 2.2339         | 5                  | 0.4468              | 19.1473 |
| Pure error              | 0.0467         | 2                  | 0.0233              |         |
| Total                   | 263.7788       | 16                 |                     |         |
| R <sup>2</sup>          | 0.9914         |                    |                     |         |
| Adjusted R <sup>2</sup> | 0.9802         |                    |                     |         |

**Table S26.** Analysis of variance (ANOVA) for the quadratic model applied using the catalyst CuZrIn and the CO<sub>2</sub> conversion results from central composite experimental design.

| Source of variation     | Sum of squares | Degrees of freedom | Mean sum of squares | F-ratio  |
|-------------------------|----------------|--------------------|---------------------|----------|
| Regression              | 470.9974       | 9                  | 52.3330             | 126.2067 |
| Residual                | 2.9026         | 7                  | 0.4147              |          |
| Lack-of-fit             | 2.8560         | 5                  | 0.5712              | 24.4797  |
| Pure error              | 0.0467         | 2                  | 0.0233              |          |
| Total                   | 473.9000       | 16                 |                     |          |
| R <sup>2</sup>          | 0.9939         |                    |                     |          |
| Adjusted R <sup>2</sup> | 0.9860         |                    |                     |          |



**Table S27.** Analysis of variance (ANOVA) for the quadratic model applied using the catalyst CuCeIn@mSiO<sub>2</sub> and the CO<sub>2</sub> conversion results from central composite experimental design.

| Source of variation     | Sum of squares | Degrees of freedom | Mean sum of squares | F-ratio  |
|-------------------------|----------------|--------------------|---------------------|----------|
| Regression              | 176.9846       | 9                  | 19.6650             | 225.4020 |
| Residual                | 0.6107         | 7                  | 0.0872              |          |
| Lack-of-fit             | 0.5840         | 5                  | 0.1168              | 8.7606   |
| Pure error              | 0.0267         | 2                  | 0.0133              |          |
| Total                   | 177.5953       | 16                 |                     |          |
| R <sup>2</sup>          | 0.9966         |                    |                     |          |
| Adjusted R <sup>2</sup> | 0.9921         |                    |                     |          |

**Table S28.** Analysis of variance (ANOVA) for the quadratic model applied using the catalyst CuCeIn and the CO<sub>2</sub> conversion results from central composite experimental design.

| Source of variation     | Sum of squares | Degrees of freedom | Mean sum of squares | F-ratio  |
|-------------------------|----------------|--------------------|---------------------|----------|
| Regression              | 89.9078        | 9                  | 9.9898              | 134.0642 |
| Residual                | 0.5216         | 7                  | 0.0745              |          |
| Lack-of-fit             | 0.5149         | 5                  | 0.1030              | 30.8962  |
| Pure error              | 0.0067         | 2                  | 0.0033              |          |
| Total                   | 90.4294        | 16                 |                     |          |
| R <sup>2</sup>          | 0.9942         |                    |                     |          |
| Adjusted R <sup>2</sup> | 0.9868         |                    |                     |          |

**Table S29.** Analysis of variance (ANOVA) for the quadratic model applied using the catalyst CuZrIn@mSiO<sub>2</sub> and the CH<sub>3</sub>OH productivity results from central composite experimental design.

| Source of variation     | Sum of squares         | Degrees of freedom | Mean sum of squares    | F-ratio |
|-------------------------|------------------------|--------------------|------------------------|---------|
| Regression              | 1.1600x10 <sup>5</sup> | 9                  | 1.2889x10 <sup>4</sup> | 89.4596 |
| Residual                | 1.0085x10 <sup>3</sup> | 7                  | 144.0760               |         |
| Lack-of-fit             | 979.8452               | 5                  | 195.9690               | 13.6627 |
| Pure error              | 28.6867                | 2                  | 14.3433                |         |
| Total                   | 1.1701x10 <sup>5</sup> | 16                 |                        |         |
| R <sup>2</sup>          | 0.9914                 |                    |                        |         |
| Adjusted R <sup>2</sup> | 0.9803                 |                    |                        |         |

**Table S30.** Analysis of variance (ANOVA) for the quadratic model applied using the catalyst CuZrIn and the CH<sub>3</sub>OH productivity results from central composite experimental design.

| Source of variation     | Sum of squares         | Degrees of freedom | Mean sum of squares | F-ratio |
|-------------------------|------------------------|--------------------|---------------------|---------|
| Regression              | 4.2352x10 <sup>4</sup> | 9                  | 4.7058e+03          | 50.2073 |
| Residual                | 656.0920               | 7                  | 93.7274             |         |
| Lack-of-fit             | 652.4054               | 5                  | 130.4811            | 70.7854 |
| Pure error              | 3.6867                 | 2                  | 1.8433              |         |
| Total                   | 4.3008x10 <sup>4</sup> | 16                 |                     |         |
| R <sup>2</sup>          | 0.9847                 |                    |                     |         |
| Adjusted R <sup>2</sup> | 0.9651                 |                    |                     |         |

**Table S31.** Analysis of variance (ANOVA) for the quadratic model applied using the catalyst CuCeIn@mSiO<sub>2</sub> and the CH<sub>3</sub>OH productivity results from central composite experimental design.

| Source of variation     | Sum of squares         | Degrees of freedom | Mean sum of squares | F-ratio  |
|-------------------------|------------------------|--------------------|---------------------|----------|
| Regression              | 8.1584x10 <sup>4</sup> | 9                  | 9.0649e+03          | 165.7810 |
| Residual                | 382.7590               | 7                  | 54.6799             |          |
| Lack-of-fit             | 361.4324               | 5                  | 72.2865             | 6.7790   |
| Pure error              | 21.3267                | 2                  | 10.6633             |          |
| Total                   | 8.1967x10 <sup>4</sup> | 16                 |                     |          |
| R <sup>2</sup>          | 0.9953                 |                    |                     |          |
| Adjusted R <sup>2</sup> | 0.9893                 |                    |                     |          |

**Table S32.** Analysis of variance (ANOVA) for the quadratic model applied using the catalyst CuCeIn and the CH<sub>3</sub>OH productivity results from central composite experimental design.

| Source of variation     | Sum of squares         | Degrees of freedom | Mean sum of squares | F-ratio  |
|-------------------------|------------------------|--------------------|---------------------|----------|
| Regression              | 5.8316x10 <sup>3</sup> | 9                  | 647.9538            | 150.0850 |
| Residual                | 30.2207                | 7                  | 4.3172              |          |
| Lack-of-fit             | 28.9607                | 5                  | 5.7921              | 9.1939   |
| Pure error              | 1.2600                 | 2                  | 0.6300              |          |
| Total                   | 5.8618x10 <sup>3</sup> | 16                 |                     |          |
| R <sup>2</sup>          | 0.9948                 |                    |                     |          |
| Adjusted R <sup>2</sup> | 0.9882                 |                    |                     |          |

### Supplementary equations

$$S_{CH_3OH}(CuCeIn@SiO_2) = (12.4488 \times P) + (3.5462 \times T) - (1.9386 \times WHSV) + (0.0050 \times P \times T) + (0.5583 \times P \times WHSV) + (0.0022 \times T \times WHSV) - (3.4504 \times P^2) - (0.0037 \times T^2) - (0.0251 \times WHSV^2) - 774.0233 \quad (S6)$$

$$X_{CO_2}(CuCeIn@SiO_2) = - (24.5047 \times P) - (0.6594 \times T) + (3.2748 \times WHSV) + (0.0580 \times P \times T) - (0.1000 \times P \times WHSV) - (0.0093 \times T \times WHSV) - (0.1893 \times P^2) + (7.1624 \times 10^{-4} \times T^2) + (0.0635 \times WHSV^2) + 154.6219 \quad (S7)$$

$$STY_{CH_3OH}(CuCeIn@SiO_2) = - (714.0929 \times P) - (12.3539 \times T) - (64.5595 \times WHSV) + (1.5050 \times P \times T) + (5.4250 \times P \times WHSV) + (0.1025 \times T \times WHSV) - (3.2897 \times P^2) + (0.0104 \times T^2) + (0.1797 \times WHSV^2) + 3610.4 \quad (S8)$$

$$S_{CH_3OH}(CuCeIn) = (40.3586 \times P) - (2.2999 \times T) - (1.1479 \times WHSV) + (0.0020 \times P \times T) + (0.2500 \times P \times WHSV) + (0.0070 \times T \times WHSV) - (7.4398 \times P^2) + (0.0014 \times T^2) - (0.1379 \times WHSV^2) + 776.7542 \quad (S9)$$

$$X_{CO_2}(CuCeIn) = - (10.0839 \times P) - (1.2744 \times T) + (3.0577 \times WHSV) + (0.0150 \times P \times T) - (0.0917 \times P \times WHSV) - (0.0072 \times T \times WHSV) + (0.8759 \times P^2) + (0.0014 \times T^2) + (0.0283 \times WHSV^2) + 295.4812 \quad (S10)$$

$$STY_{CH_3OH}(CuCeIn) = - (133.0658 \times P) - (4.7756 \times T) - (19.9925 \times WHSV) + (0.1800 \times P \times T) + (0.8000 \times P \times WHSV) + (0.0387 \times T \times WHSV) + (10.9352 \times P^2) + (0.0047 \times T^2) + (0.0229 \times WHSV^2) + 1275.0 \quad (S11)$$

$$S_{CH_3OH}(CuZrIn@SiO_2) = (38.8670 \times P) + (3.5397 \times T) + (2.8709 \times WHSV) - (0.0060 \times P \times T) + (0.1833 \times P \times WHSV) - (0.0030 \times T \times WHSV) - (6.8384 \times P^2) - (0.0037 \times T^2) - (0.0917 \times WHSV^2) - 803.7628 \quad (S12)$$

$$X_{CO_2}(CuZrIn@SiO_2) = - (41.8743 \times P) - (0.6544 \times T) + (3.7262 \times WHSV) + (0.0940 \times P \times T) - (0.2000 \times P \times WHSV) - (0.0097 \times T \times WHSV) + (0.1314 \times P^2) + (6.4655 \times 10^{-4} \times T^2) + (0.0606 \times WHSV^2) + 167.2108 \quad (S13)$$

$$STY_{CH_3OH}(CuZrIn@SiO_2) = - (1037.0 \times P) - (6.9234 \times T) - (84.4930 \times WHSV) + (2.1417 \times P \times T) + (7.4917 \times P \times WHSV) + (0.1492 \times T \times WHSV) - (0.8133 \times P^2) + (0.0031 \times T^2) - (0.1188 \times WHSV^2) + 2673.8 \quad (S14)$$

$$\begin{aligned}
S_{CH_3OH}(CuZrIn) = & - (47.6781 \times P) + (2.3455 \times T) - (4.2148 \times WHSV) + \\
& (0.1060 \times P \times T) - (0.3000 \times P \times WHSV) + (0.0177 \times T \times WHSV) + \\
& (0.0215 \times P^2) - (0.0035 \times T^2) - (0.1487 \times WHSV^2) - 275.3418 \quad (S15)
\end{aligned}$$

$$\begin{aligned}
X_{CO_2}(CuZrIn) = & - (21.5096 \times P) - (2.3062 \times T) + (5.2389 \times WHSV) + \\
& (0.0530 \times P \times T) - (0.1250 \times P \times WHSV) - (0.0148 \times T \times WHSV) - (0.2782 \times P^2) \\
& + (0.0025 \times T^2) + (0.0983 \times WHSV^2) + 533.5096 \quad (S16)
\end{aligned}$$

$$\begin{aligned}
STY_{CH_3OH}(CuZrIn@SiO_2) = & - (412.3320 \times P) - (3.6636 \times T) - \\
& (85.9226 \times WHSV) + (0.8450 \times P \times T) + (2.0917 \times P \times WHSV) + \\
& (0.1678 \times T \times WHSV) + (2.8645 \times P^2) + (0.0019 \times T^2) + (0.1444 \times WHSV^2) \\
& + 1373.8 \quad (S17)
\end{aligned}$$

## References

- (1) Sun, K.; Fan, Z.; Ye, J.; Yan, J.; Ge, Q.; Li, Y.; He, W.; Yang, W.; Liu, C. Hydrogenation of CO<sub>2</sub> to Methanol over In<sub>2</sub>O<sub>3</sub> Catalyst. *Journal of CO<sub>2</sub> Utilization* **2015**, *12*, 1–6.  
<https://doi.org/https://doi.org/10.1016/j.jcou.2015.09.002>.
- (2) Zou, R.; Shen, C.; Sun, K.; Ma, X.; Li, Z.; Li, M.; Liu, C.-J. CO<sub>2</sub> Hydrogenation to Methanol over the Copper Promoted In<sub>2</sub>O<sub>3</sub> Catalyst. *Journal of Energy Chemistry* **2024**, *93*, 135–145.  
<https://doi.org/https://doi.org/10.1016/j.jechem.2024.01.027>.
- (3) Zhu, J.; Su, Y.; Chai, J.; Muravev, V.; Kosinov, N.; Hensen, E. J. M. Mechanism and Nature of Active Sites for Methanol Synthesis from CO/CO<sub>2</sub> on Cu/CeO<sub>2</sub>. *ACS Catal* **2020**, *10* (19), 11532–11544.  
<https://doi.org/10.1021/acscatal.0c02909>.
- (4) Kattel, S.; Yan, B.; Yang, Y.; Chen, J. G.; Liu, P. Optimizing Binding Energies of Key Intermediates for CO<sub>2</sub> Hydrogenation to Methanol over Oxide-Supported Copper. *J Am Chem Soc* **2016**, *138* (38), 12440–12450.  
<https://doi.org/10.1021/jacs.6b05791>.
- (5) Witoon, T.; Chalorngtham, J.; Dumrongbunditkul, P.; Chareonpanich, M.; Limtrakul, J. CO<sub>2</sub> Hydrogenation to Methanol over Cu/ZrO<sub>2</sub> Catalysts: Effects of Zirconia Phases. *Chemical Engineering Journal* **2016**, *293*, 327–336.  
<https://doi.org/https://doi.org/10.1016/j.cej.2016.02.069>.
- (6) Sharma, S. K.; Paul, B.; Pal, R. S.; Bhanja, P.; Banerjee, A.; Samanta, C.; Bal, R. Influence of Indium as a Promoter on the Stability and Selectivity of the Nanocrystalline Cu/CeO<sub>2</sub> Catalyst for CO<sub>2</sub> Hydrogenation to Methanol. *ACS Appl Mater Interfaces* **2021**, *13* (24), 28201–28213.  
<https://doi.org/10.1021/acsmi.1c05586>.
- (7) Zhang, G.; Fan, G.; Yang, L.; Li, F. Tuning Surface-Interface Structures of ZrO<sub>2</sub> Supported Copper Catalysts by in Situ Introduction of Indium to Promote CO<sub>2</sub> Hydrogenation to Methanol. *Appl Catal A Gen* **2020**, *605*, 117805.  
<https://doi.org/https://doi.org/10.1016/j.apcata.2020.117805>.
- (8) Yao, L.; Shen, X.; Pan, Y.; Peng, Z. Synergy between Active Sites of Cu-In-Zr-O Catalyst in CO<sub>2</sub> Hydrogenation to Methanol. *J Catal* **2019**, *372*, 74–85.  
<https://doi.org/https://doi.org/10.1016/j.jcat.2019.02.021>.
- (9) Shi, Z.; Tan, Q.; Wu, D. A Novel Core–Shell Structured CuIn@SiO<sub>2</sub> Catalyst for CO<sub>2</sub> Hydrogenation to Methanol. *AIChE Journal* **2019**, *65* (3), 1047–1058.  
<https://doi.org/https://doi.org/10.1002/aic.16490>.
- (10) Yang, H.; Gao, P.; Zhang, C.; Zhong, L.; Li, X.; Wang, S.; Wang, H.; Wei, W.; Sun, Y. Core–Shell Structured Cu@m-SiO<sub>2</sub> and Cu/ZnO@m-SiO<sub>2</sub> Catalysts for Methanol Synthesis from CO<sub>2</sub> Hydrogenation. *Catal Commun* **2016**, *84*, 56–60. <https://doi.org/https://doi.org/10.1016/j.catcom.2016.06.010>.

- (11) Kosari, M.; Anjum, U.; Xi, S.; Lim, A. M. H.; Seayad, A. M.; Raj, E. A. J.; Kozlov, S. M.; Borgna, A.; Zeng, H. C. Revamping SiO<sub>2</sub> Spheres by Core–Shell Porosity Endowment to Construct a Mazelike Nanoreactor for Enhanced Catalysis in CO<sub>2</sub> Hydrogenation to Methanol. *Adv Funct Mater* **2021**, *31* (47), 2102896. <https://doi.org/https://doi.org/10.1002/adfm.202102896>.
